# Supplementary material for: Cigarette Smoking, Risky Alcohol Consumption, and Marijuana Smoking among University Students in Germany: Identification of Potential Sociodemographic and Study-Related Risk Groups and Predictors of Consumption
Source: MDPI journal article supplement (doi:10.3390/healthcare11243182), 2023-12-16
Supplement: s1 [file s1]

## Supplementary Materials

# Cigarette Smoking, Risky Alcohol Consumption, and Marijuana Smoking among University Students in Germany: Identification of Potential Sociodemographic and Study-Related Risk Groups and Predictors of Consumption

Thilo A. Hoff <sup>1</sup>, Sebastian Heller <sup>1</sup>, Jennifer L. Reichel <sup>1</sup>, Antonia M. Werner <sup>2</sup>, Markus Schäfer <sup>3,†</sup>, Ana Nanette Tibubos <sup>2,4</sup>, Perikles Simon <sup>5</sup>, Manfred E. Beutel <sup>2</sup>, Stephan Letzel <sup>1</sup>, Thomas Rigotti <sup>6,7</sup> and Pavel Dietz <sup>1,\*</sup>

<sup>1</sup> Institute of Occupational, Social and Environmental Medicine, University Medical Centre of the Johannes Gutenberg University, 55131 Mainz, Germany; thilo.hoff@web.de (T.A.H.); seheller@uni-mainz.de (S.H.); jreichel@uni-mainz.de (J.L.R.); letzel@uni-mainz.de (S.L.)

<sup>2</sup> Department of Psychosomatic Medicine and Psychotherapy, University Medical Center of the Johannes Gutenberg University, 55131 Mainz, Germany; antonia.werner@unimedizin-mainz.de (A.M.W.); tibubos@uni-trier.de (A.N.T.); manfred.beutel@unimedizin-mainz.de (M.E.B.)

<sup>3</sup> Department of Communication, Johannes Gutenberg University, 55122 Mainz, Germany; markus.schaefer@uni-mainz.de

<sup>4</sup> Nursing Science, Diagnostics in Healthcare and E-Health, Trier University, 54296 Trier, Germany

<sup>5</sup> Department of Sports Medicine, Rehabilitation and Disease Prevention, Institute of Sport Science, Johannes Gutenberg University, 55122 Mainz, Germany; simonpe@uni-mainz.de

<sup>6</sup> Department of Work, Organizational and Business Psychology, Institute of Psychology, Johannes Gutenberg University, 55122 Mainz, Germany; rigotti@uni-mainz.de

<sup>7</sup> Leibniz Institute of Resilience Research, 55122 Mainz, Germany

\* Correspondence: pdietz@uni-mainz.de; Tel.: +49-6131-17-9213

† Current address: Department of Media and Communication Management, Macromedia University of Applied Sciences, 60488 Frankfurt, Germany.

## Supplementary Table S1. List of all 56 variables used in the present study and their characteristics.

| Dimension                  | Variable (count)        | Scale                  | Reference | Item | "Question for the self-constructed item," answering options                      |
|----------------------------|-------------------------|------------------------|-----------|------|----------------------------------------------------------------------------------|
| Sociodemographic variables | Gender (1)              | Self-constructed items |           | 1    | "Your gender": male (1) / female (2) / diverse (3)                               |
|                            | Age (1)                 | Self-constructed items |           | 1    | "Your age in years"                                                              |
|                            | Relationship status (1) | Self-constructed items |           | 1    | "What is your relationship status?"<br>Single (1) / Partnership in one household |

|                                            |                        |   |  |                                                                                                                                                                |
|--------------------------------------------|------------------------|---|--|----------------------------------------------------------------------------------------------------------------------------------------------------------------|
|                                            |                        |   |  | (2) / Partnership with separate living conditions (3)                                                                                                          |
| Employment (1)                             | Self-constructed items | 1 |  | “Are you currently employed?” No (1) / Yes, full-time (2) / Yes, regularly part-time (3) / Yes, marginally or irregularly employed (4)                         |
| Financial situation                        | Self-constructed items | 1 |  | “How much money do you have at your disposal on average each month?”                                                                                           |
| Parental support                           | Self-constructed items | 1 |  | “How do you finance your studies?” Support by parents or relatives: Yes / No                                                                                   |
| Parents’ educational background            | Self-constructed items | 1 |  | “Please select the highest educational attainment of your mother or your father (the highest of both)”: List of attainments, also including “other attainment” |
| Migrant background                         | Self-constructed items | 1 |  | “Were both of your parents born within the current geography of Germany?” Yes (1) / No (2) / Don’t know (3) / No information (4)                               |
| Personal migration experience (1)          | Self-constructed items | 1 |  | “Were you born in the current geography of Germany?” Yes (1) / No (2) / Don’t know (3) / No information (4)                                                    |
| Degree (1)                                 | Self-constructed items | 1 |  | “Which degree are you pursuing in your current studies?” Drop-down list of all degrees at the University of Mainz                                              |
| Field of study (1)                         | Self-constructed items | 1 |  | Grouped variable created for “What is your current study subject or special subject?” Drop-down list of all subjects of the University of Mainz                |
| First year (Semester / study progress) (1) | Self-constructed items | 1 |  | “What is the number of your current university semester?”                                                                                                      |

|                                      |                                                                 |                        |                               |                                                                                                                                                                                             |
|--------------------------------------|-----------------------------------------------------------------|------------------------|-------------------------------|---------------------------------------------------------------------------------------------------------------------------------------------------------------------------------------------|
|                                      | First study                                                     | Self-constructed items | 1                             | “Have you started or completed another degree program before your current one?” No (1) / Yes, graduate before (2) / Yes, but changed the field of study (3) / Yes, but did not graduate (4) |
|                                      | Semester hours and semester hours with mandatory attendance (2) | Self-constructed items | 2                             | “How many hours per week are you taking this semester?” and “Of these, how many require your attendance?”                                                                                   |
| Psychological variables              | Somatic symptoms                                                | SSS8                   | Gierk et al. 8 (2014) [120]   |                                                                                                                                                                                             |
|                                      | Depression symptoms                                             | PHQ-9                  | Kroenke et al. 9 (2001) [126] |                                                                                                                                                                                             |
|                                      | General anxiety                                                 | GAS-2                  | Döring & Bortz (1993) [114]   |                                                                                                                                                                                             |
|                                      | Social anxiety                                                  | Mini-SPIN              | Wiltink et al. 3 (2017) [136] |                                                                                                                                                                                             |
|                                      | Loneliness                                                      | UCLA                   | Döring & Bortz (1993) [114]   |                                                                                                                                                                                             |
|                                      | Emotional exhaustion                                            | MBI-SS                 | Gumz et al. 5 (2013) [121]    |                                                                                                                                                                                             |
| Study-related psychosocial variables | Presenteeism                                                    |                        | Töpritz et al. 1 (2016) [134] |                                                                                                                                                                                             |
|                                      | Absenteeism                                                     |                        | Töpritz et al. 1 (2016) [134] |                                                                                                                                                                                             |
|                                      | Perceived employability                                         | Self-constructed items | 1                             | “How do you estimate your chances on the job market?” Very Bad (1) to Very Good (7)                                                                                                         |

|                                                                                  |        |                                       |
|----------------------------------------------------------------------------------|--------|---------------------------------------|
| Autonomy                                                                         | BARI-S | Gusy & 6<br>Lohmann<br>(2014) [122]   |
| Coping through the<br>use of structural re-<br>sources and social<br>support (2) |        | Daniels et al. 4<br>(2008) [112]      |
| Self-endangering be-<br>havior                                                   |        | Krause et al.<br>(2015) [125]         |
| Planning compe-<br>tency                                                         |        | Dettmers & 8<br>Clauß (2018)<br>[113] |
| Work complexity                                                                  |        | Gusy et al.<br>(2016) [123]           |
| Competition                                                                      |        | Fend (1997) 4<br>[119]                |
| Performance pres-<br>sure                                                        |        | Fend (1997) 5<br>[119]                |
| Cognitive irritation                                                             |        | Mohr et al.<br>(2005) [127]           |
| Social support by SALSA<br>teachers                                              |        | Rimann & 3<br>Udris (1997)<br>[129]   |
| Social support by fel-<br>low students                                           | SALSA  | Rimann & 3<br>Udris (1997)<br>[129]   |
| Competence for self-<br>motivation                                               |        | Dettmers & 8<br>Clauß (2018)<br>[113] |

|                                |                     |              |                                                               |   |                                                                                                                                                                                                                                                                                                                                                                                           |
|--------------------------------|---------------------|--------------|---------------------------------------------------------------|---|-------------------------------------------------------------------------------------------------------------------------------------------------------------------------------------------------------------------------------------------------------------------------------------------------------------------------------------------------------------------------------------------|
|                                | Self-efficacy       |              | Self-Efficacy Scale, adapted from Rigotti et al. (2008) [128] | 6 |                                                                                                                                                                                                                                                                                                                                                                                           |
|                                | Procrastination     | GPS-K        | Klingsieck & Fries [128]                                      | 9 |                                                                                                                                                                                                                                                                                                                                                                                           |
| General psychosocial variables | Self-criticism      | DEQ-SC4      | Rudich et al. (2008) [130]                                    | 4 |                                                                                                                                                                                                                                                                                                                                                                                           |
|                                | Self-acceptance     |              | Ryff & Keyes (1995); Ryff (1989) [131-132]                    | 3 |                                                                                                                                                                                                                                                                                                                                                                                           |
|                                | Emotion regulation  | ERQ          | Abler & Kessler (2011) [115]                                  | 4 |                                                                                                                                                                                                                                                                                                                                                                                           |
|                                | Emotion suppression | ERQ          | Abler & Kessler (2011) [115]                                  | 4 |                                                                                                                                                                                                                                                                                                                                                                                           |
|                                | Impulsiveness       | ERQ          | Abler & Kessler (2011) [115]                                  | 4 |                                                                                                                                                                                                                                                                                                                                                                                           |
| Health variables               | behavior            | Healthy diet | Self-constructed items                                        | 1 | <p>“A healthy diet consists of eating a large quantity of whole grains, potatoes, fruit, and vegetables several times a day and food low in trans fats as well as a small quantity of red meat and sausages, fast-food (e.g., burger, fries), and sugar-rich food (e.g., lemonade, soft drinks, candy, cake). To what extent have you study to a healthy diet in the last month?” Not</p> |

|                           |                        |                                                                                                                                                                                    |                               |
|---------------------------|------------------------|------------------------------------------------------------------------------------------------------------------------------------------------------------------------------------|-------------------------------|
|                           |                        |                                                                                                                                                                                    | at all (1) to Very strong (5) |
| Fruit consumption         |                        | European Comission (2013); Fehr et al. (2018) [117-118]                                                                                                                            | 4                             |
| Vegetable consumption     |                        | European Comission (2013); Fehr et al. (2018) [117-118]                                                                                                                            | 4                             |
| Physical activity         | IPAQ Short version     | Craig et al. (2003); International Physical Activity Questionnaire [116, 135]                                                                                                      |                               |
| Sedentary behavior        | IPAQ Short version     | Craig et al. (2003); International Physical Activity Questionnaire [116, 135]                                                                                                      | 7                             |
| Smoking cigarettes        |                        | Töpritz et al. (2016) [134]                                                                                                                                                        | 1                             |
| Risky alcohol consumption | AUDIT-C                | Bush et al. (1998) [85]                                                                                                                                                            | 1                             |
| Marijuana smoking         | Self-constructed items | “Do you smoke marijuana?” <i>never</i> (1) / <i>formerly occasionally</i> (2) / <i>formerly regularly</i> (3) / <i>currently occasionally</i> (4) / <i>currently regularly</i> (5) |                               |

Use of neuroen-  
hancement (2)

Dietz et al. 2  
(2016) [93]

Use of social-media

Adapted from 6  
Stark et al.  
(2017) [133]

**Supplementary Table S2. Association between the dependent variable cigarette smoking and each independent variable (pre-test for regression).**

| Variable                             | <i>p</i> -value    |
|--------------------------------------|--------------------|
| <b>1) Sociodemographic variables</b> |                    |
| Gender                               | <sup>c</sup> <.001 |
| Age, median split                    | <sup>b</sup> .486  |
| Relationship status                  | <sup>c</sup> .430  |
| Employment                           | <sup>c</sup> <.001 |
| Financial situation                  | <sup>a</sup> <.001 |
| Parental support                     | <sup>c</sup> .159  |
| Parents' educational background      | <sup>c</sup> .278  |
| Migrant background                   | <sup>c</sup> <.001 |
| Personal migrant experience          | <sup>c</sup> .001  |
| Aspired degree                       | <sup>c</sup> .095  |
| Field of study                       | <sup>c</sup> <.001 |
| Semester                             | <sup>a</sup> .921  |
| First study                          | <sup>c</sup> .001  |

|                                                   |                   |
|---------------------------------------------------|-------------------|
| First year                                        | <sup>c</sup> .516 |
| Semester hours per week                           | <sup>a</sup> .005 |
| Semester hours per week with mandatory attendance | <sup>a</sup> .001 |

## 2) Psychological variables

---

|                      |                    |
|----------------------|--------------------|
| Somatic symptoms     | <sup>a</sup> <.001 |
| Depression symptoms  | <sup>a</sup> <.001 |
| General anxiety      | <sup>a</sup> <.001 |
| Social anxiety       | <sup>a</sup> .663  |
| Loneliness           | <sup>a</sup> .374  |
| Emotional exhaustion | <sup>a</sup> .002  |

## 3) Study-related psychosocial variables

---

|                                        |                    |
|----------------------------------------|--------------------|
| Presenteeism                           | <sup>a</sup> .428  |
| Absenteeism                            | <sup>a</sup> .001  |
| Perceived employability                | <sup>a</sup> .002  |
| Autonomy                               | <sup>a</sup> .990  |
| Autonomy exams                         | <sup>a</sup> .123  |
| Coping via use of structural resources | <sup>a</sup> .188  |
| Coping via use of social resources     | <sup>a</sup> .198  |
| Self-endangering behavior              | <sup>a</sup> .813  |
| Planning competency                    | <sup>a</sup> <.001 |



---

|                                     |                    |
|-------------------------------------|--------------------|
| Work complexity                     | <sup>a</sup> .603  |
| Competition                         | <sup>a</sup> .421  |
| Performance pressure                | <sup>a</sup> .064  |
| Cognitive irritation                | <sup>a</sup> .064  |
| Social support from teachers        | <sup>a</sup> .294  |
| Social support from fellow students | <sup>a</sup> .401  |
| Competence for self-motivation      | <sup>a</sup> <.001 |
| Self-efficacy                       | <sup>a</sup> .001  |
| Procrastination                     | <sup>a</sup> <.001 |

#### 4) General psychosocial variables

---

|                     |                    |
|---------------------|--------------------|
| Self-criticism      | <sup>a</sup> .059  |
| Self-acceptance     | <sup>a</sup> <.001 |
| Emotion regulation  | <sup>a</sup> .209  |
| Emotion suppression | <sup>a</sup> .316  |
| Impulsiveness       | <sup>a</sup> <.001 |

#### 5) Health behavior variables

---

|                       |                    |
|-----------------------|--------------------|
| Healthy diet          | <sup>b</sup> <.001 |
| Fruit consumption     | <sup>a</sup> .010  |
| Vegetable consumption | <sup>a</sup> .377  |
| Physical activity     | <sup>b</sup> .347  |

|                                         |                    |
|-----------------------------------------|--------------------|
| Sedentary behavior                      | <sup>a</sup> .101  |
| AUDIT-C score                           | <sup>a</sup> <.001 |
| Marijuana smoking                       | <sup>c</sup> <.001 |
| Use of soft neuroenhancement            | <sup>c</sup> <.001 |
| Use of pharmacological neuroenhancement | <sup>c</sup> <.001 |
| Use of social media                     | <sup>a</sup> <.001 |

<sup>a</sup> ANOVA test.

<sup>b</sup> Pearson's chi-square test.

<sup>c</sup> Cramer's V-test.

**Supplementary Table S3. Association between the dependent variable risky alcohol consumption and each independent variable (pretest for regression).**

| Variable                             | <i>p</i> -value    |
|--------------------------------------|--------------------|
| <b>1) Sociodemographic variables</b> |                    |
| Gender                               | <sup>c</sup> .120  |
| Age, median split                    | <sup>b</sup> .001  |
| Relationship status                  | <sup>c</sup> <.001 |
| Employment                           | <sup>c</sup> <.001 |
| Financial situation                  | <sup>a</sup> .007  |
| Parental support                     | <sup>c</sup> <.001 |
| Parents' educational background      | <sup>c</sup> .118  |
| Migrant background                   | <sup>c</sup> <.001 |

---

|                                                   |                    |
|---------------------------------------------------|--------------------|
| Personal migrant experience                       | <sup>c</sup> .002  |
| Aspired degree                                    | <sup>c</sup> .032  |
| Field of study                                    | <sup>c</sup> .001  |
| Semester                                          | <sup>a</sup> <.001 |
| First study                                       | <sup>c</sup> .001  |
| First year                                        | <sup>c</sup> .030  |
| Semester hours per week                           | <sup>a</sup> .418  |
| Semester hours per week with mandatory attendance | <sup>a</sup> .206  |

## 2) Psychological variables

---

|                      |                    |
|----------------------|--------------------|
| Somatic symptoms     | <sup>a</sup> .767  |
| Depression symptoms  | <sup>a</sup> .339  |
| General anxiety      | <sup>a</sup> <.001 |
| Social anxiety       | <sup>a</sup> <.001 |
| Loneliness           | <sup>a</sup> <.001 |
| Emotional exhaustion | <sup>a</sup> .089  |

## 3) Study-related psychosocial variables

---

|                         |                   |
|-------------------------|-------------------|
| Presenteeism            | <sup>a</sup> .020 |
| Absenteeism             | <sup>a</sup> .616 |
| Perceived employability | <sup>a</sup> .839 |
| Autonomy                | <sup>a</sup> .318 |

---

|                                        |                    |
|----------------------------------------|--------------------|
| Autonomy exams                         | <sup>a</sup> .608  |
| Coping via use of structural resources | <sup>a</sup> .372  |
| Coping via use of social resources     | <sup>a</sup> .949  |
| Self-endangering behavior              | <sup>a</sup> .011  |
| Planning competency                    | <sup>a</sup> .432  |
| Work complexity                        | <sup>a</sup> .930  |
| Competition                            | <sup>a</sup> .089  |
| Performance pressure                   | <sup>a</sup> .010  |
| Cognitive irritation                   | <sup>a</sup> <.001 |
| Social support by teachers             | <sup>a</sup> .590  |
| Social support by fellow students      | <sup>a</sup> <.001 |
| Competence for self-motivation         | <sup>a</sup> .447  |
| Self-efficacy                          | <sup>a</sup> .149  |
| Procrastination                        | <sup>a</sup> <.001 |

#### 4) General psychosocial variables

---

|                     |                    |
|---------------------|--------------------|
| Self-criticism      | <sup>a</sup> .239  |
| Self-acceptance     | <sup>a</sup> <.001 |
| Emotion regulation  | <sup>a</sup> .762  |
| Emotion suppression | <sup>a</sup> <.001 |
| Impulsiveness       | <sup>a</sup> <.001 |

### 5) Health behavior variables

|                                         |                    |
|-----------------------------------------|--------------------|
| Healthy diet                            | <sup>b</sup> .004  |
| Fruit consumption                       | <sup>a</sup> <.001 |
| Vegetable consumption                   | <sup>a</sup> .326  |
| Physical activity                       | <sup>b</sup> <.001 |
| Sedentary behavior                      | <sup>a</sup> .006  |
| Cigarette smoking                       | <sup>c</sup> <.001 |
| Marijuana smoking                       | <sup>c</sup> <.001 |
| Use of soft neuroenhancement            | <sup>c</sup> <.001 |
| Use of pharmacological neuroenhancement | <sup>c</sup> <.001 |
| Use of social media                     | <sup>a</sup> <.001 |

<sup>a</sup> ANOVA test.

<sup>b</sup> Pearson's chi-square test.

<sup>c</sup> Cramer's V-test.

**Supplemental Table S4. Association between the dependent variable marijuana smoking and each independent variable (pretest for regression)**

| <i>Variable</i>                      | <i>p-value</i>     |
|--------------------------------------|--------------------|
| <b>1) Sociodemographic variables</b> |                    |
| Gender                               | <sup>c</sup> <.001 |
| Age, median split                    | <sup>b</sup> .034  |
| Relationship status                  | <sup>c</sup> .014  |
| Employment                           | <sup>c</sup> .012  |
| Finances                             | <sup>a</sup> .193  |
| Parental support                     | <sup>c</sup> .028  |
| Parents' education                   | <sup>c</sup> .189  |
| Parents' migration                   | <sup>c</sup> .479  |
| Own migration                        | <sup>c</sup> .727  |

|                                       |                    |
|---------------------------------------|--------------------|
| Aspired degree                        | <sup>c</sup> <.001 |
| Field of study                        | <sup>c</sup> <.001 |
| Semester                              | <sup>a</sup> .028  |
| First study                           | <sup>c</sup> <.001 |
| First year                            | <sup>c</sup> .725  |
| Semester hours per week               | <sup>a</sup> <.001 |
| Semester hours per week in attendance | <sup>a</sup> .007  |

## 2) Psychological variables

|                      |                    |
|----------------------|--------------------|
| Physical complaints  | <sup>a</sup> .380  |
| Depression symptoms  | <sup>a</sup> <.001 |
| Anxiety symptoms     | <sup>a</sup> .355  |
| Social anxiety       | <sup>a</sup> .535  |
| Loneliness           | <sup>a</sup> .235  |
| Emotional exhaustion | <sup>a</sup> .851  |

## 3) Study-related psychosocial variables

|                                        |                    |
|----------------------------------------|--------------------|
| Presenteeism                           | <sup>a</sup> .070  |
| Absenteeism                            | <sup>a</sup> .279  |
| Perceived employability                | <sup>a</sup> .659  |
| Autonomy                               | <sup>a</sup> .231  |
| Autonomy exams                         | <sup>a</sup> .650  |
| Coping via use of structural resources | <sup>a</sup> .297  |
| Coping via use of social resources     | <sup>a</sup> .239  |
| Self-endangering behavior              | <sup>a</sup> <.001 |
| Planning competency                    | <sup>a</sup> <.001 |
| Work complexity                        | <sup>a</sup> .249  |
| Competition                            | <sup>a</sup> .335  |
| Performance pressure                   | <sup>a</sup> <.001 |
| Cognitive irritation                   | <sup>a</sup> .201  |
| Social support from teachers           | <sup>a</sup> .423  |
| Social support from fellow students    | <sup>a</sup> .906  |
| Competence for self-motivation         | <sup>a</sup> <.001 |
| Self-efficacy                          | <sup>a</sup> .401  |
| Procrastination                        | <sup>a</sup> <.001 |

## 4) General psychosocial variables

|                     |                   |
|---------------------|-------------------|
| Self-criticism      | <sup>a</sup> .541 |
| Self-acceptance     | <sup>a</sup> .279 |
| Emotion regulation  | <sup>a</sup> .365 |
| Emotion suppression | <sup>a</sup> .867 |
| Impulsiveness       | <sup>a</sup> .002 |

## 5) Health behavior variables

|                   |                   |
|-------------------|-------------------|
| Healthy diet      | <sup>b</sup> .249 |
| Fruit consumption | <sup>a</sup> .990 |

|                                         |                    |
|-----------------------------------------|--------------------|
| Vegetable consumption                   | <sup>a</sup> .241  |
| Physical activity                       | <sup>b</sup> <.001 |
| Sedentary behavior                      | <sup>a</sup> .091  |
| AUDIT-C score                           | <sup>a</sup> <.001 |
| Cigarette smoking                       | <sup>c</sup> <.001 |
| Use of soft neuroenhancement            | <sup>c</sup> <.001 |
| Use of pharmacological Neuroenhancement | <sup>c</sup> <.001 |
| Use of social media                     | <sup>a</sup> .011  |

a ANOVA test.

b Pearson's chi-square test.

c Cramer's V-test.

**Supplemental Table S5. Answering rate for each independent variable (included group, N = 3991)**

| Variable                                          | Answering | Percentage |
|---------------------------------------------------|-----------|------------|
| <b>1) Sociodemographic variables</b>              |           |            |
| Gender                                            | 3991      | 100.0%     |
| Age                                               | 3987      | 99.9%      |
| Relationship status                               | 3987      | 99.9%      |
| Employment                                        | 3991      | 100.0%     |
| Financial situation                               | 3911      | 98.0%      |
| Parental support                                  | 3968      | 99.4%      |
| Parents' educational background                   | 3989      | 99.9%      |
| Migrant background                                | 3990      | 100.0%     |
| Personal migration experience                     | 3990      | 100.0%     |
| Aspired degree                                    | 3991      | 100.0%     |
| Field of study                                    | 3982      | 99.8%      |
| Semester                                          | 3975      | 99.6%      |
| First study                                       | 3989      | 99.9%      |
| First year                                        | 3884      | 97.3%      |
| Semester hours per week                           | 3867      | 96.9%      |
| Semester hours per week with mandatory attendance | 3873      | 97.0%      |
| <b>2) Psychological variables</b>                 |           |            |
| Physical complaints                               | 3988      | 99.9%      |
| Depression symptoms                               | 3987      | 99.9%      |
| Anxiety symptoms                                  | 3990      | 100.0%     |
| Social anxiety                                    | 3617      | 90.6%      |

|                                                |      |        |
|------------------------------------------------|------|--------|
| Loneliness                                     | 3991 | 100.0% |
| Emotional exhaustion                           | 3909 | 97.9%  |
| <b>3) Study-related psychosocial variables</b> |      |        |
| Presenteeism                                   | 3897 | 97.6%  |
| Absenteeism                                    | 3898 | 97.7%  |
| Perceived employability                        | 3892 | 97.5%  |
| Autonomy                                       | 3949 | 98.9%  |
| Autonomy exams                                 | 3943 | 98.8%  |
| Coping via use of structural resources         | 3937 | 98.6%  |
| Coping via use of social resources             | 3941 | 98.7%  |
| Self-endangering behavior                      | 3935 | 98.6%  |
| Planning competency                            | 3935 | 98.6%  |
| Work complexity                                | 3922 | 98.3%  |
| Competition                                    | 3921 | 98.2%  |
| Performance pressure                           | 3920 | 98.2%  |
| Cognitive irritation                           | 3909 | 97.9%  |
| Social support by teachers                     | 3892 | 97.5%  |
| Social support by fellow students              | 3900 | 97.7%  |
| Competence for self-motivation                 | 3891 | 97.5%  |
| Self-efficacy                                  | 3890 | 97.5%  |
| Procrastination                                | 3932 | 98.5%  |
| <b>4) General psychosocial variables</b>       |      |        |
| Self-criticism                                 | 3881 | 97.2%  |
| Self-acceptance                                | 3880 | 97.2%  |
| Emotion regulation                             | 3879 | 97.2%  |
| Emotion suppression                            | 3880 | 97.2%  |
| Impulsiveness                                  | 3874 | 97.1%  |
| <b>5) Health behavior variables</b>            |      |        |
| Healthy diet                                   | 3991 | 100.0% |
| Fruit consumption                              | 3649 | 91.4%  |
| Vegetable consumption                          | 3806 | 95.4%  |
| Physical activity                              | 3899 | 97.7%  |
| Sedentary behavior                             | 3899 | 97.7%  |
| Use of soft neuroenhancement                   | 3984 | 99.8%  |
| Use of pharmacological neuroenhancement        | 3984 | 99.8%  |
| Use of social media                            | 3987 | 99.9%  |
| Average                                        | 3923 | 98.3%  |

Supplemental Table S6. Answering rate for each independent variable (non-included group, N = 360)



| Variable                                          | <i>answering</i> | per-<br>cent |
|---------------------------------------------------|------------------|--------------|
| <b>1) Sociodemographic variables</b>              |                  |              |
| Gender                                            | 359              | 99.7%        |
| Age                                               | 360              | 100.0%       |
| Relationship status                               | 360              | 100.0%       |
| Employment                                        | 95               | 26.4%        |
| Financial situation                               | 0                | 0.0%         |
| Parental support                                  | 0                | 0.0%         |
| Parents' educational background                   | 360              | 100.0%       |
| Migrant background                                | 360              | 100.0%       |
| Personal migration experience                     | 360              | 100.0%       |
| Aspired degree                                    | 360              | 100.0%       |
| Field of study                                    | 360              | 100.0%       |
| Semester                                          | 358              | 99.4%        |
| First study                                       | 360              | 100.0%       |
| First year                                        | 342              | 95.0%        |
| Semester hours per week                           | 0                | 0.0%         |
| Semester hours per week with mandatory attendance | 0                | 0.0%         |
| <b>2) Psychological variables</b>                 |                  |              |
| Physical complaints                               | 340              | 94.4%        |
| Depression symptoms                               | 320              | 88.9%        |
| Anxiety symptoms                                  | 297              | 82.5%        |
| Social anxiety                                    | 267              | 74.2%        |
| Loneliness                                        | 297              | 82.5%        |
| Emotional exhaustion                              | 0                | 0.0%         |
| <b>3) Study-related psychosocial variables</b>    |                  |              |
| Presenteeism                                      | 0                | 0.0%         |
| Absenteeism                                       | 0                | 0.0%         |
| Perceived employability                           | 0                | 0.0%         |
| Autonomy                                          | 0                | 0.0%         |
| Autonomy exams                                    | 0                | 0.0%         |
| Coping via use of structural resources            | 0                | 0.0%         |
| Coping via use of social resources                | 0                | 0.0%         |
| Self-endangering behavior                         | 0                | 0.0%         |
| Planning competency                               | 0                | 0.0%         |
| Work complexity                                   | 0                | 0.0%         |
| Competition                                       | 0                | 0.0%         |
| Performance pressure                              | 0                | 0.0%         |
| Cognitive irritation                              | 0                | 0.0%         |
| Social support by teachers                        | 0                | 0.0%         |
| Social support by fellow students                 | 0                | 0.0%         |

|                                          |     |       |
|------------------------------------------|-----|-------|
| Competence for self-motivation           | 0   | 0.0%  |
| Self-efficacy                            | 0   | 0.0%  |
| Procrastination                          | 0   | 0.0%  |
| <b>4) General psychosocial variables</b> |     |       |
| Self-criticism                           | 0   | 0.0%  |
| Self-acceptance                          | 0   | 0.0%  |
| Emotion regulation                       | 0   | 0.0%  |
| Emotion suppression                      | 0   | 0.0%  |
| Impulsiveness                            | 0   | 0.0%  |
| <b>5) Health behavior variables</b>      |     |       |
| Healthy diet                             | 153 | 42.5% |
| Fruit consumption                        | 124 | 34.4% |
| Vegetable consumption                    | 100 | 27.8% |
| Physical activity                        | 29  | 8.1%  |
| Sedentary behavior                       | 29  | 8.1%  |
| Use of soft neuroenhancement             | 0   | 0.0%  |
| Use of pharmacological neuroenhancement  | 0   | 0.0%  |
| Use of social media                      | 224 | 62.2% |
| Average                                  | 117 | 32.6% |
